# Supplementary material
Source: PubMed Central journal article supplement (PMC3340996)
Supplement: 1120327109_pnas.1120327109_SI.pdf [file 1120327109_pnas.1120327109_SI.pdf]

# Supporting Information

Terasawa et al. 10.1073/pnas.1120327109

## SI Materials and Methods

**Modeling of Shape Transformation.** To determine whether the depletion volume effect can drive budding transformation, we evaluated the change of free energy due to the change in depletion volume  $\Delta E_{\text{dep}}$  and bending energy  $\Delta E_{\text{bend}}$  by approximating the shape before and after transformation as a spherocylinder (subscript sc) and two spheres (subscript ts), respectively. A spherocylinder has two geometrical parameters: the radius  $R_{\text{sc}}$  and length  $L_{\text{sc}}$  of the cylinder. Two spheres have only one geometrical parameter: the radius of two spheres  $R_{\text{ts}}$ . When these two shapes have the identical volume and surface area, the following relationships hold:

$$\text{Volume: } \frac{4}{3}\pi R_{\text{sc}}^3 + \pi R_{\text{sc}}^2 L_{\text{sc}} = 2 \times \frac{4}{3}\pi R_{\text{ts}}^3. \quad [\text{S1}]$$

$$\text{Surface Area: } 4\pi R_{\text{sc}}^2 + 2\pi R_{\text{sc}} L_{\text{sc}} = 2 \times 4\pi R_{\text{ts}}^2. \quad [\text{S2}]$$

In both equations, the terms in the left- and right-hand sides describe the quantities of a spherocylinder and two spheres, respectively. By equating [S1] and [S2], we derive the relationships of three geometrical parameters written as

$$R_{\text{sc}} = (\sqrt{3} - 1)R_{\text{ts}}. \quad [\text{S3}]$$

$$L_{\text{sc}} = 4R_{\text{ts}}. \quad [\text{S4}]$$

Next, we derive the depletion volume of these two shapes written as

$$V_{\text{dep,sc}} = \left( \pi R_{\text{sc}}^2 L + \frac{4}{3}\pi R_{\text{sc}}^3 \right) - \left( \pi (R_{\text{sc}} - r_g)^2 + \frac{4}{3}(R_{\text{sc}} - r_g)^3 \right) \quad [\text{S5}]$$

and

$$V_{\text{dep,ts}} = 2 \times \frac{4}{3}\pi (R_{\text{ts}}^3 - (R_{\text{ts}} - r_g)^3), \quad [\text{S6}]$$

where  $r_g$  is the gyration radius of the encapsulated polymer. From Eqs. S3–S6, we readily obtain the change of the depletion volume along with the shape transformation from the spherocylinder to two spheres:

$$\Delta V_{\text{dep}} = V_{\text{dep,sc}} - V_{\text{dep,ts}} = \frac{4}{3}\pi r_g^2 (3(2 - \sqrt{3})R_{\text{ts}} - r_g). \quad [\text{S7}]$$

The decrease of the energy due to this reduction of depletion volume is written as

$$\Delta E_{\text{dep}} = \Delta\Pi \cdot \Delta V_{\text{dep}}, \quad [\text{S8}]$$

where  $\Delta\Pi$  represents the difference in osmotic pressure between solutions in bulk and the depletion volume. Thus, we obtain the scaling relationship

$$|\Delta E_{\text{dep}}| \propto \Delta\Pi \cdot r_g^2 R_{\text{ts}}. \quad [\text{S9}]$$

Next, we derive the difference in the bending energy of the membrane. The bending energy of a spherocylinder can be derived as the sum of the contributions of a cylinder and two semispherical caps, written as

$$E_{\text{bend,sc}} = 8\pi\kappa_b + \pi\kappa_b \frac{L_{\text{sc}}}{R_{\text{sc}}}, \quad [\text{S10}]$$

whereas that of two spheres is simply the sum of the bending energies of the two spheres;

$$E_{\text{bend,ts}} = 2 \times 8\pi\kappa_b. \quad [\text{S11}]$$

The change of bending energy along with the shape transformation is then obtained using Eqs. S3 and S4 as

$$\Delta E_{\text{bend}} = E_{\text{bend,sc}} - E_{\text{bend,ts}} = 2\pi\kappa_b (3 - \sqrt{3}), \quad [\text{S12}]$$

which is constant and independent of the vesicle size.

Using these equations, we can evaluate the change of the free energy from these contributions along with the shape transformation. We calculated the case of  $R_{\text{ts}} = 2.5 \mu\text{m}$  (total volume and surface area are, respectively,  $131 \mu\text{m}^3$  and  $157 \mu\text{m}^2$ ) for the polymer-encapsulating conditions examined, and the results are summarized in Table S1. The osmolarity of the polymer-containing buffer was measured by an osmometer (OM-815; Biomedical Sciences, Inc.), and  $\Delta\Pi$  was derived as the difference from the buffer without polymer.

Based on this theory, vesicles with a spherocylindrical shape spontaneously transform to a budded shape (two spheres) in conditions where  $|\Delta E_{\text{dep}}|$  is greater than  $|\Delta E_{\text{bend}}|$  ( $|\Delta E_{\text{bend}}| = 8.0 \times 10^{-19} \text{ J}$  assuming  $\kappa_b = 10^{-19} \text{ J}$ ). The selected results are plotted in Fig. 4B in the main text. Overall, the quantity of  $|\Delta E_{\text{dep}}|$  calculated is greater than  $|\Delta E_{\text{bend}}|$  in conditions with  $P_{\text{bud}}(v_{\text{red}} = 0.7) > 0.1$  (budding occurred). This estimation proves that the depletion volume effect is the primary cause of vesicle transformation.





















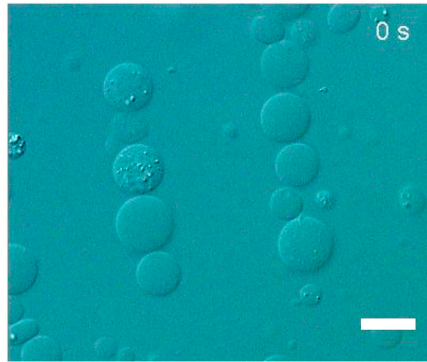

**Movie S8.** Differential interference contrast observation of the fusion to budding transformation of GUVs containing 3 mM PEG 20000. Time-lapse sequence with 1-s intervals is played at four frames/s (x4 play speed). (Scale bar: 10  $\mu\text{m}$ .)

[Movie S8 \(MOV\)](#)

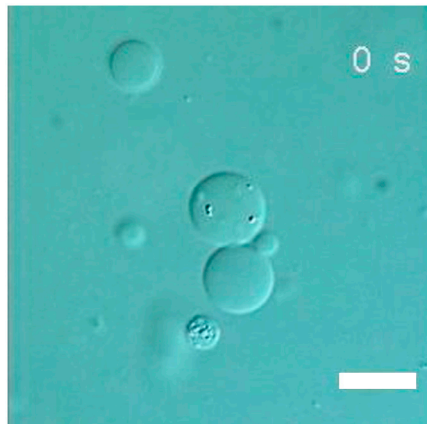

**Movie S9.** Differential interference contrast observation of repeated cycles of fusion to budding transformation containing 3 mM PEG 6000. Time-lapse sequence with 1-s intervals is played at four frames/s (x4 play speed). (Scale bar: 10  $\mu\text{m}$ .)

[Movie S9 \(MOV\)](#)

**Table S1.  $\Delta E_{\text{dep}}$  estimated for experimental conditions tested**

|           | Gyration radius,* nm | Polymer conc, mM | Osmolarity, <sup>†</sup> mOsm | $\Delta\Pi$ , J/m <sup>3</sup> | $\Delta V_{\text{dep}}$ , m <sup>3</sup> | $\Delta E_{\text{dep}}$ , J |
|-----------|----------------------|------------------|-------------------------------|--------------------------------|------------------------------------------|-----------------------------|
| Buffer    | —                    | 0                | 642                           | —                              | —                                        | —                           |
| PEG 400   | 0.69                 | 3                | 645                           | $7.40 \times 10^3$             | $3.89 \times 10^{-24}$                   | $2.88 \times 10^{-20}$      |
|           |                      | 62               | 806                           | $4.05 \times 10^5$             |                                          | $1.57 \times 10^{-18}$      |
| PEG 6000  | 3.19                 | 0.3              | 644                           | $5.55 \times 10^3$             | $8.55 \times 10^{-23}$                   | $4.75 \times 10^{-19}$      |
|           |                      | 1.5              | 674                           | $7.81 \times 10^4$             |                                          | $6.68 \times 10^{-18}$      |
|           |                      | 3                | 708                           | $1.64 \times 10^5$             |                                          | $1.40 \times 10^{-17}$      |
|           |                      | 6                | 830                           | $4.63 \times 10^5$             |                                          | $3.96 \times 10^{-17}$      |
| PEG 20000 | 4.95                 | 1.25             | 724                           | $2.05 \times 10^5$             | $2.06 \times 10^{-22}$                   | $4.16 \times 10^{-17}$      |
|           |                      | 3                | 914                           | $6.72 \times 10^5$             |                                          | $1.38 \times 10^{-16}$      |
| DEX-6000  | 2.56                 | 3                | 664                           | $5.43 \times 10^4$             | $5.47 \times 10^{-23}$                   | $2.97 \times 10^{-18}$      |
| DEX-25000 | 4.97                 | 3                | 747                           | $2.61 \times 10^5$             | $2.07 \times 10^{-22}$                   | $5.39 \times 10^{-17}$      |
| DEX-50000 | 6.85                 | 1.5              | 747                           | $2.60 \times 10^5$             | $3.94 \times 10^{-22}$                   | $1.02 \times 10^{-16}$      |

\*The gyration radius of PEG and Dextran was calculated using the equations reported in refs. 1 and 2, respectively.

<sup>†</sup>Osmolarity was measured using an osmometer (OM-815; Biomedical Sciences, Inc.).

1. Kawaguchi S, et al. (1997) Aqueous solution properties of oligo- and poly(ethylene oxide) by static light scattering and intrinsic viscosity. *Polymer* 38:2885–2891.
2. Fishman ML, et al. (1987) Evaluation of root-mean-square radius of gyration as a parameter for universal calibration of polysaccharides. *Carbohydr Res* 160:215–225.
